# Supplementary material
Source: PubMed Central journal article supplement (PMC4319445)
Supplement: JCI78253sd.pdf [file JCI78253sd.pdf]

## **Supplemental data**

# **UCP2 promotes inflammation in sepsis through FASN-dependent NLRP3-inflammasome activation**

**Jong-Seok Moon<sup>1,2</sup>, Seonmin Lee<sup>3</sup>, Mi-Ae Park<sup>4</sup>, Ilias I. Siempos<sup>1,2,5</sup>,  
Maria Haslip<sup>6</sup>, Patty J. Lee<sup>6</sup>, Mijin Yun<sup>7</sup>, Chun K. Kim<sup>4</sup>, Judie  
Howrylak<sup>8</sup>, Stefan W. Ryter<sup>1,2</sup>, Kiichi Nakahira<sup>1,2</sup> and Augustine M.K.  
Choi<sup>1\*</sup>**

**Supplemental Figure 1-14 and Supplemental Table 1**

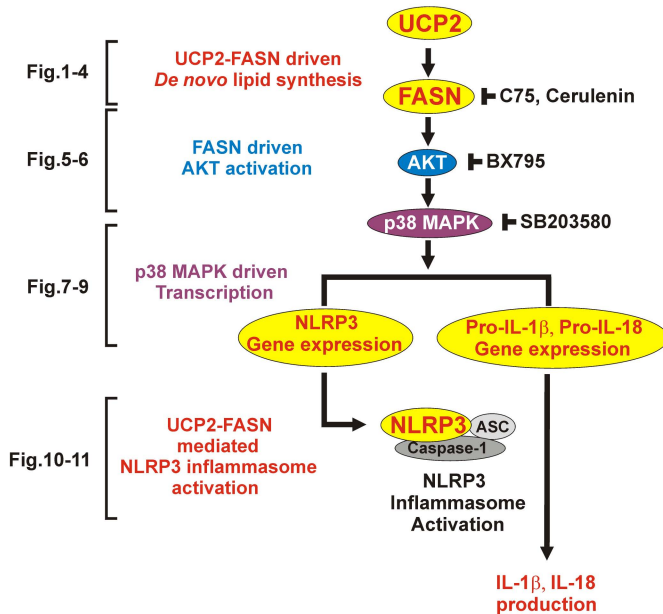

## Supplemental Figure 1.

Summary of localization and relevance for individual data in our whole mechanism.

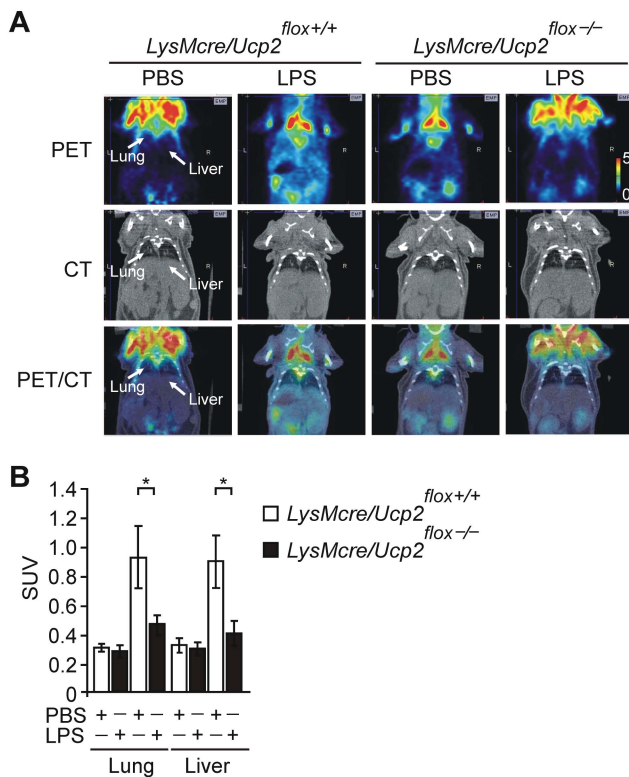

## Supplemental Figure 2.

Deficiency of UCP2 suppresses glucose utilization in vivo. **(A)** Coronal SUV of PET/CT imaging using <sup>18</sup>F-FDG of lung and liver from *LysMcre/Ucp2*<sup>flox+/+</sup> or *LysMcre/Ucp2*<sup>flox-/-</sup> mice after injection of LPS for 4 h (10 mg/kg, i.p.). Image is representative of three independent experiments. **(B)** Quantification of coronal SUV in PET/CT imaging from A. n = 3 per group, \*P<0.05 by ANOVA.

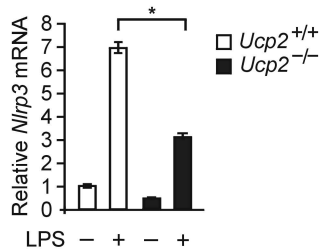

### Supplemental Figure 3.

Quantitative PCR analysis for *Nlrp3* gene expression in *Ucp2*<sup>+/+</sup> or *Ucp2*<sup>-/-</sup> BMDMs treated with LPS (500 ng/ml) for 4 h. \**P* < 0.05 by ANOVA.

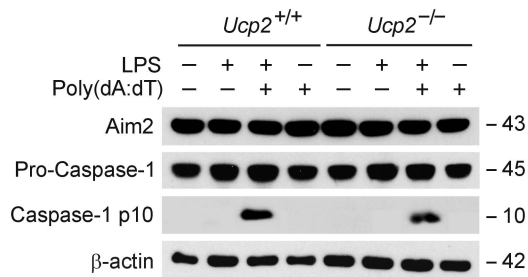

### Supplemental Figure 4.

Deficiency of UCP2 does not suppress AIM2-mediated caspase-1 activation in macrophages. Immunoblot analysis for AIM2 and caspase-1 in cell lysates from *Ucp2*<sup>+/+</sup> or *Ucp2*<sup>-/-</sup> BMDMs treated with LPS (500 ng/ml) for 4 h and followed by incubation with poly(dA:dT) (1 μg/ml) for 6 h. β-actin served as the standard.

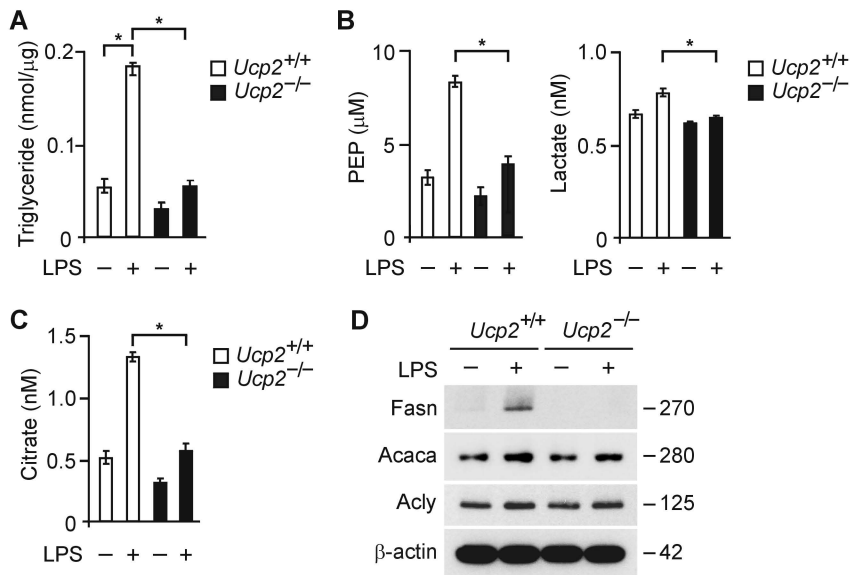

### Supplemental Figure 5.

UCP2 regulates lipid synthesis via FASN in macrophages. **(A)** The measurement of triglycerides (TG) in *Ucp2*<sup>+/+</sup> or *Ucp2*<sup>-/-</sup> peritoneal macrophages treated with LPS (500 ng/ml) for 4 h. \**P*<0.05 by ANOVA. **(B)** The measurement of PEP and lactate production in *Ucp2*<sup>-/-</sup> or *Ucp2*<sup>+/+</sup> peritoneal macrophages treated with LPS (500 ng/ml) for 4 h. \**P*<0.05 by ANOVA. **(C)** The measurement of citrate production in *Ucp2*<sup>+/+</sup> or *Ucp2*<sup>-/-</sup> peritoneal macrophages treated with LPS (500 ng/ml) for 4 h. \**P*<0.05 by ANOVA. **(D)** Immunoblot analysis for FASN, ACACA and ACLY in cell lysates from *Ucp2*<sup>+/+</sup> or *Ucp2*<sup>-/-</sup> peritoneal macrophages treated with LPS (500 ng/ml) for 4 h. β-actin served as the standard.

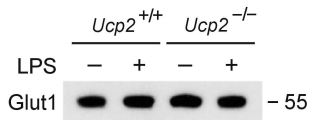

### Supplemental Figure 6.

Deficiency of UCP2 does not affect GLUT1 expression in macrophages. Immunoblot analysis for GLUT1 in cell lysates from *Ucp2*<sup>+/+</sup> or *Ucp2*<sup>-/-</sup> BMDMs treated with LPS (500 ng/ml) for 4 h.

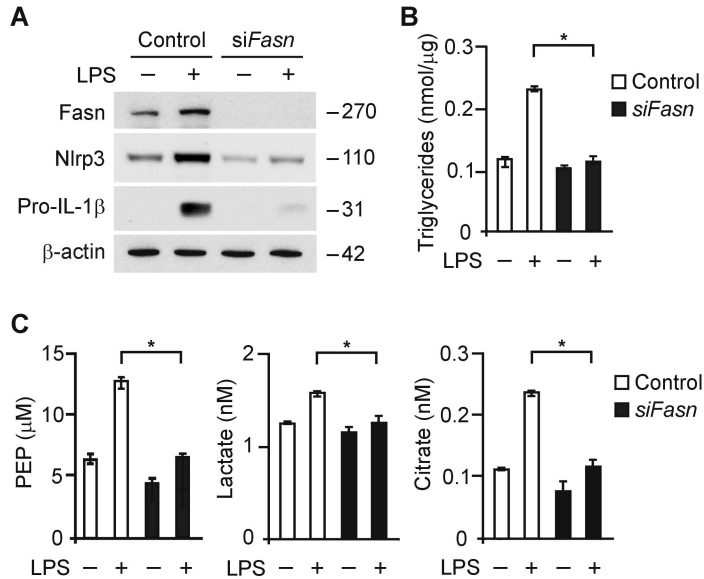

### Supplemental Figure 7.

FASN regulates NLRP3 and IL-1 $\beta$  expression in macrophages. **(A)** Immunoblot analysis for FASN, NLRP3 and IL-1 $\beta$  in cell lysates from mouse J774A.1 macrophages transfected with control siRNA or siRNA for *Fasn* (*siFasn*), and treated with LPS (500 ng/ml) for 4 h.  $\beta$ -actin served as the standard. **(B)** The measurement of triglycerides (TG) production in mouse J774A.1 macrophages transfected with control siRNA or siRNA for *Fasn* (*siFasn*), treated with LPS (500 ng/ml) for 4 h. \* $P$ <0.05 by ANOVA. **(C)** The measurement of PEP, citrate and lactate production in mouse J774A.1 macrophages transfected with control siRNA or siRNA for *Fasn* (*siFasn*), and treated with LPS (500 ng/ml) for 4 h. \* $P$ <0.05 by ANOVA.



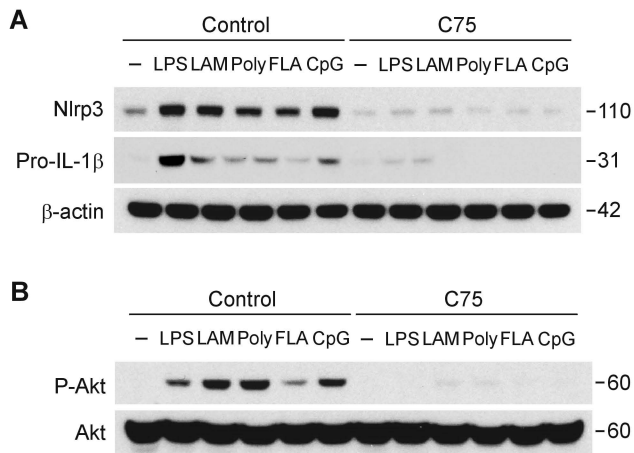

### Supplemental Figure 8.

Inhibition of FASN by C75 suppresses NLRP3 and IL-1 $\beta$  expression in response to TLR agonists in macrophages. **(A)** Immunoblot analysis for NLRP3 and IL-1 $\beta$  in cell lysates from wild type BMDMs pre-treated with C75 (20  $\mu$ M) for 2 h before stimulation with TLR agonists (LPS; 500 ng/ml, LAM; 20  $\mu$ g/ml, Poly(I:C); 10  $\mu$ g/ml, Flagellin; 40 ng/ml, CpG oligo; 5  $\mu$ M) for 6 h.  $\beta$ -actin served as the standard. **(B)** Immunoblot analysis of the phosphorylation of AKT on Ser-473 in cell lysates from wild type BMDMs pre-treated with C75 (20  $\mu$ M) for 2 h before stimulation with TLR agonists (LPS; 500 ng/ml, LAM; 20  $\mu$ g/ml, Poly(I:C); 10  $\mu$ g/ml, Flagellin; 40 ng/ml, CpG oligo; 5  $\mu$ M) for 6 h. Total AKT served as the standard.

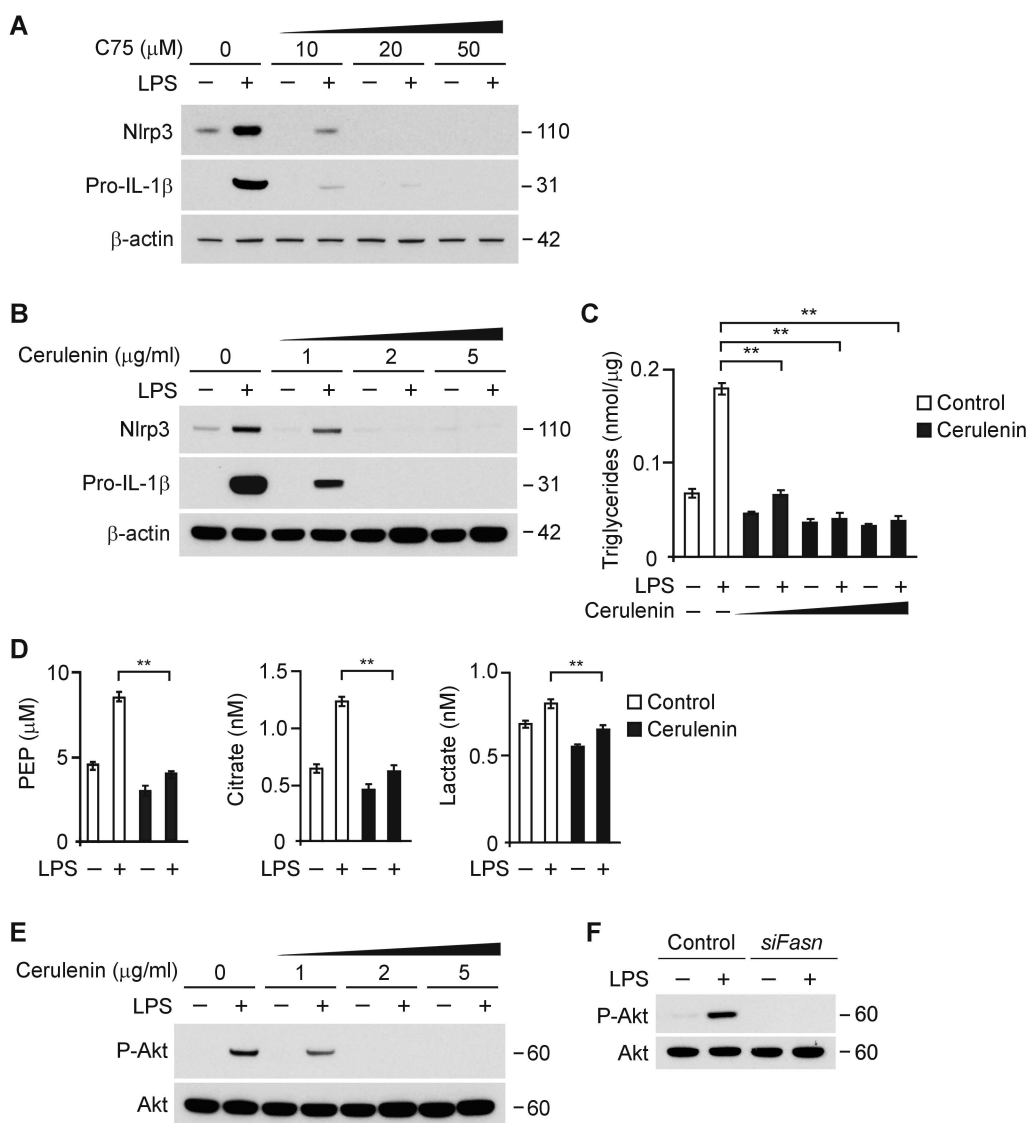

### Supplemental Figure 9.

FASN regulates NLRP3 and IL-1 $\beta$  expression through AKT activation in macrophages. **(A)** Immunoblot analysis for NLRP3 and IL-1 $\beta$  in cell lysates from wild type peritoneal macrophages pre-treated with C75 (0, 10, 20 and 50  $\mu\text{M}$ ) for 2 h before stimulation with LPS (500 ng/ml, 4 h).  $\beta$ -actin served as the standard. **(B)** Immunoblot analysis for NLRP3 and IL-1 $\beta$ , and **(C)** The measurement of triglycerides (TG) production in cell lysates from wild type peritoneal macrophages pre-treated with cerulenin (0, 1, 2 and 5  $\mu\text{g/ml}$ ) for 2 h before stimulation with LPS (500 ng/ml, 4 h).  $\beta$ -actin served as the standard. **\*\*** $P < 0.01$  by ANOVA. **(D)** The measurement of PEP, citrate and lactate production from wild type peritoneal macrophages pre-treated with cerulenin (2  $\mu\text{g/ml}$ ) for 2 h before stimulation with LPS (500 ng/ml, 4 h). **\*\*** $P < 0.01$  by ANOVA. **(E)** Immunoblot analysis of the phosphorylation of AKT on Ser-473 in cell lysates from wild type peritoneal macrophages pre-treated with cerulenin (0, 1, 2 and 5  $\mu\text{g/ml}$ ) for 2 h before stimulation with LPS (500 ng/ml, 4 h). Total AKT served as the standard. **(F)** Immunoblot analysis of the phosphorylation of AKT on Ser-473 in cell lysates from mouse J774A.1 macrophages transfected with control siRNA or siRNA for *Fasn* (*siFasn*), treated with LPS (500 ng/ml) for 4 h. Total AKT served as the standard.

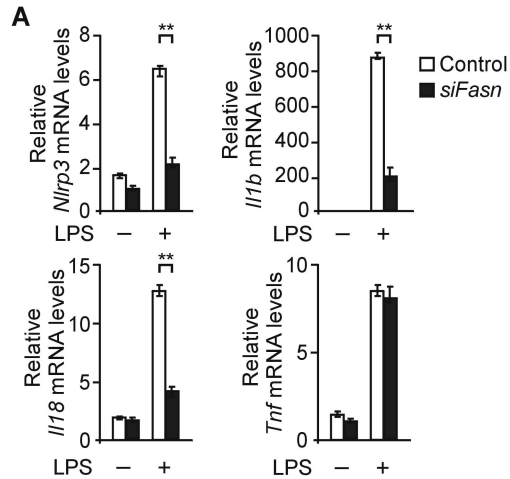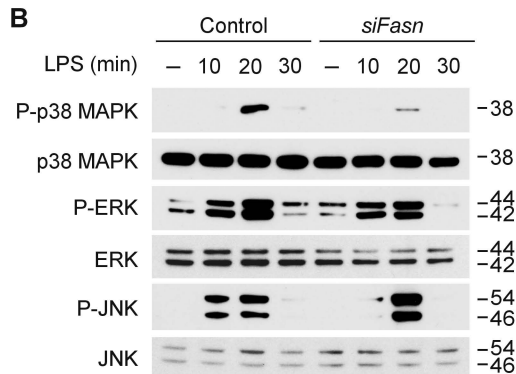

### Supplemental Figure 10.

Deficiency of FASN suppresses the transcription of NLRP3 and IL-1 $\beta$  gene through p38 MAPK in macrophages. **(A)** Quantitative PCR analysis for *Nlrp3*, *Il1b*, *Il18* and *Tnf* gene expression from mouse J774A.1 macrophages transfected with control siRNA or siRNA for *Fasn* (*siFasn*), and stimulated with LPS (500 ng/ml) for 4 h. \*\* $P < 0.01$  by ANOVA. **(B)** Immunoblot analysis for activation of p38 MAPK, ERK and JNK in cell lysates from mouse J774A.1 macrophages transfected with control siRNA or siRNA for *Fasn* (*siFasn*), and stimulated with LPS (500 ng/ml) for 0, 10, 20 and 30 min.

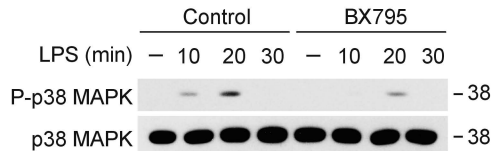

### Supplemental Figure 11.

Inhibition of AKT activation suppresses the activation of p38 MAPK in macrophages. Immunoblot analysis for activation of p38 MAPK in cell lysates from wild type BMDMs pre-treated with BX795 (10  $\mu$ M) for 1 h before stimulation with LPS (500 ng/ml) for 0, 10, 20 and 30 min. p38 MAPK served as the standard.

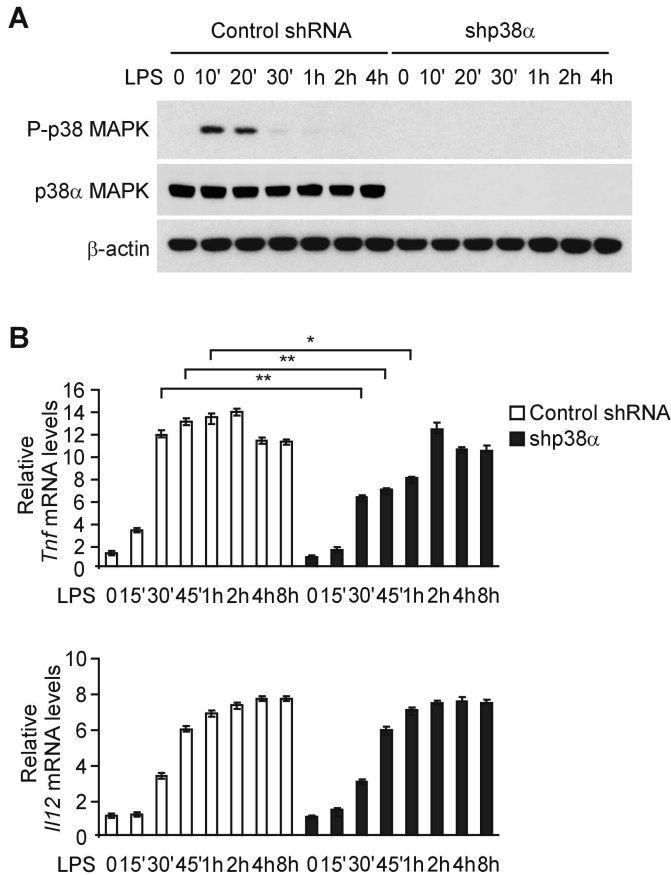

### Supplemental Figure 12.

Inhibition of p38 MAPK activation suppresses the transcription of NLRP3 and IL-1 $\beta$  gene in macrophages. **(A)** Immunoblot analysis for activation of p38 MAPK in cell lysates from wild type mice peritoneal macrophages transduced with lentiviruses expressing control shRNA or shRNA for p38 $\alpha$  (shp38 $\alpha$ ), and stimulated with LPS (500 ng/ml) for 0, 10 min, 20 min, 30 min, 1 h, 2 h and 4 h. **(B)** Quantitative PCR analysis for *Tnf* and *Il12* gene expression from wild type mice peritoneal macrophages transduced with lentiviruses expressing control shRNA or shRNA for p38 $\alpha$  (shp38 $\alpha$ ), and stimulated with LPS (500 ng/ml) for 0, 15 min, 30 min, 45 min, 1 h, 2 h, 4 h and 8 h. \*\* $P$ <0.01, \* $P$ <0.05 by ANOVA.

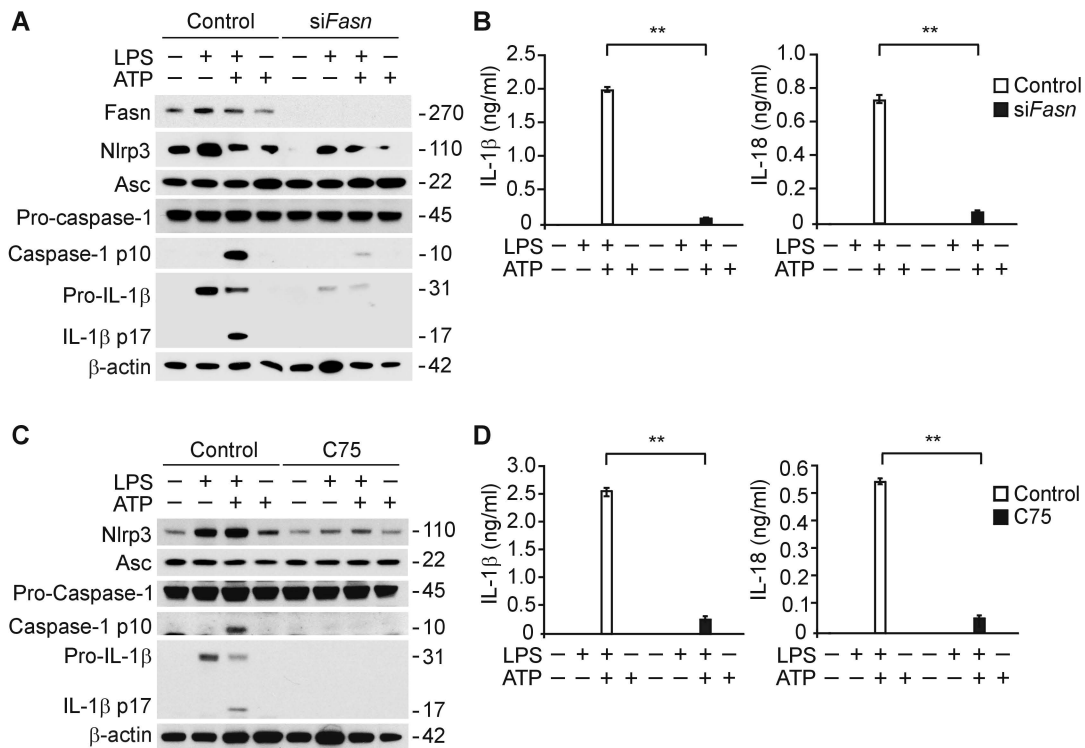

### Supplemental Figure 13.

FASN regulates NLRP3 mediated caspase-1 activation in macrophages. **(A)** Immunoblot analysis for caspase-1 and IL-1β of cell lysates from mouse J774A.1 macrophages transfected with control siRNA or siRNA for *Fasn* (*siFasn*), treated with LPS (500 ng/ml) for 4 h, followed by incubation with ATP (5 mM) for 30 min. β-actin served as the standard. **(B)** Luminex assay and ELISA assay for IL-1β and IL-18 in the media from A. \*\* $P < 0.01$  by ANOVA. **(C)** Immunoblot analysis for IL-1β and NLRP3 of cell lysates from wild-type BMDMs pre-treated with C75 (20 μM) for 2 h before stimulation with LPS (500 ng/ml) for 4 h, followed by incubation with ATP (5 mM) for 30 min. β-actin served as the standard. **(D)** Luminex assay and ELISA assay for IL-1β and IL-18 in the media from C. \*\* $P < 0.01$  by ANOVA.

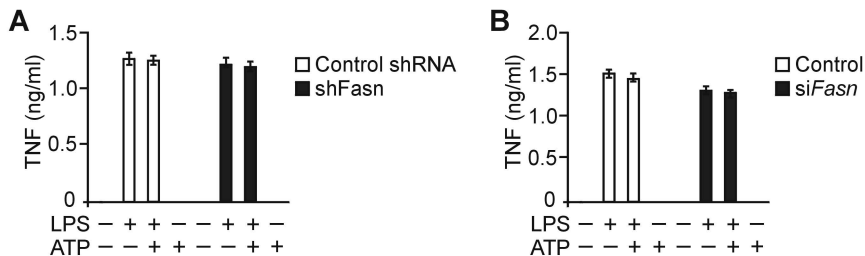

### Supplemental Figure 14.

Deficiency of FASN does not affect TNF secretion in macrophages. **(A)** ELISA assay for TNF in the media from wild type mice peritoneal macrophages transduced with lentiviruses expressing non-target shRNA (Control shRNA) or shRNA for Fasn (shFasn), and stimulation with LPS (500 ng/ml) for 4 h, followed by incubation with ATP (5 mM) for 30 min. **(B)** Luminex assay and ELISA assay for TNF in the media from mouse J774A.1 macrophages transfected with control siRNA or siRNA for *Fasn* (*siFasn*), and stimulation with LPS (500 ng/ml) for 4 h, followed by incubation with ATP (5 mM) for 30 min.

**Supplemental Table 1.** Demographics of Brigham and Women's Hospital Registry of Critical Illness Patients.

|                                   | Control<br>(N = 21) | Sepsis<br>(N = 29) | P-value |
|-----------------------------------|---------------------|--------------------|---------|
| Age, mean (SD)                    | 51.5 (14.5)         | 61.3 (14.4)        | 0.02*   |
| Gender N (%)                      |                     |                    |         |
| Male                              | 8 (38.1)            | 15 (51.7)          | 0.40    |
| Female                            | 13 (61.9)           | 14 (48.3)          |         |
| Race N (%)                        |                     |                    |         |
| White                             | 15 (23.8)           | 24 (82.8)          | 0.44    |
| Black                             | 5 (4.8)             | 3 (10.3)           |         |
| Hispanic                          | 1 (71.4)            | 2 (6.9)            |         |
| Asian/Pacific Islander            | 0 (0)               | 0 (0)              |         |
| Length of stay, d, median (range) | 17 (3, 45)          | 13 (4, 43)         | 0.74    |
| In-hospital mortality, N (%)      |                     |                    |         |
| Yes                               | 7 (33.3)            | 2 (6.9)            | 0.03*   |
| No                                | 14 (66.6)           | 27 (93.1)          |         |

\*Represents significant differences Control vs other patient groups.

(\*P value < 0.05, Wilcoxon Rank Sum test for continuous data and Fisher's Exact test for categorical data).
